# Supplementary material
Source: PubMed Central journal article supplement (PMC4113335)
Supplement: NIHMS605414-supplement-Table_2.pdf [file NIHMS605414-supplement-Table_2.pdf]

| Neurocognitive domain                            | Definition                                                           | Task                                                                                     | Neural system                                                                                                                                                                       | Neurochemistry                                                             |
|--------------------------------------------------|----------------------------------------------------------------------|------------------------------------------------------------------------------------------|-------------------------------------------------------------------------------------------------------------------------------------------------------------------------------------|----------------------------------------------------------------------------|
| <b>Contingency-related cognitive flexibility</b> | Impaired adaptation of behaviour after negative feedback             | Probabilistic reversal-learning tasks                                                    | OFC, parietal cortex and subcortical connections                                                                                                                                    | Serotonin                                                                  |
| <b>Task/attentional set-shifting</b>             | Impaired switching of attention between stimuli                      | Extra-dimensional attentional set-shifting (CANTAB)                                      | Ventrolateral PFC and subcortical connections <sup>262</sup>                                                                                                                        | Dopamine                                                                   |
| <b>Attentional bias/disengagement</b>            | Impaired shifting of mental sets away from disorder-relevant stimuli | Attentional bias/disengagement tasks e.g. Dot-Probe, Stroop, Affective Go/No Go (CANTAB) | Frontal and subcortical regions                                                                                                                                                     | Emotion-dependent attentional bias/disengagement: serotonin <sup>263</sup> |
| <b>Habit learning</b>                            | Lack of sensitivity to goals or outcomes of actions                  | Habit formation tasks testing appetitive or avoidance habit - learning                   | Fronto-striatal circuits; Habit activity involves connections between premotor cortex and posterior putamen ; Goal-directed activity involves connections between VMPFC and caudate | Dopamine                                                                   |

**Table 2 - Subdividing Compulsivity: Abbreviated Summary of Neurocognitive Domains, Tasks, Neural and Neurochemical Correlates.**

**OFC = Orbitofrontal cortex; PFC = Prefrontal cortex VMPFC = ventromedial prefrontal cortex; CANTAB = Cambridge Neuropsychological Test Automated Battery**
